# Supplementary material for: The Effects of Previous Thyroid Disease on the Susceptibility to, Morbidity of, and Mortality Due to COVID-19: A Nationwide Cohort Study in South Korea
Source: MDPI journal article supplement (doi:10.3390/jcm10163522), 2021-08-11
Supplement: s1 [file s1]

**Table S1.** Stratified subgroup analyses of odd ratios of each thyroid disease for COVID-19 infection in total participants in total participants by covariates

| Characteristics                  | COVID-19            | Control             | ORs (95% confidence interval) for COVID-19 |         |                   |         |                  |         |                  |         |
|----------------------------------|---------------------|---------------------|--------------------------------------------|---------|-------------------|---------|------------------|---------|------------------|---------|
|                                  | (exposure/total, %) | (exposure/total, %) | Crude†                                     | P-value | Model 1†‡         | P-value | Model 2†§        | P-value | Model 3†         | P-value |
| Age < 50 years old ( n = 21,410) |                     |                     |                                            |         |                   |         |                  |         |                  |         |
| Hypothyroidism                   | 97/4,282 (2.3%)     | 319/17,128 (1.9%)   | 0.82 (0.65-1.03)                           | 0.085   | 0.88 (0.69-1.11)  | 0.266   | 1.17 (0.92-1.50) | 0.203   | 1.16 (0.91-1.48) | 0.243   |
| Hyperthyroidism                  | 49/4,282 (1.1%)     | 218/17,128 (1.3%)   | 1.12 (0.82-1.52)                           | 0.497   | 1.16 (0.85-1.59)  | 0.348   | 0.85 (0.61-1.18) | 0.328   | N/A              |         |
| Grave’s disease                  | 9/4,282 (0.2%)      | 52/17,128 (0.3%)    | 1.45 (0.71-2.94)                           | 0.307   | 1.49 (0.73-3.03)  | 0.274   | N/A              |         | 0.65 (0.32-1.33) | 0.241   |
| Thyroiditis                      | 43/4,282 (1.0%)     | 176/17,128 (1.0%)   | 1.02 (0.73-1.43)                           | 0.891   | 1.04 (0.74-1.46)  | 0.807   | 0.95 (0.66-1.37) | 0.798   | N/A              |         |
| Autoimmune thyroiditis           | 19/4,282 (0.4%)     | 68/17,128 (0.4%)    | 0.89 (0.54-1.49)                           | 0.667   | 0.95 (0.57-1.58)  | 0.833   | N/A              |         | 1.00 (0.58-1.69) | 0.985   |
| Age ≥ 50 years old (n = 18,940)  |                     |                     |                                            |         |                   |         |                  |         |                  |         |
| Hypothyroidism                   | 187/3,788 (4.9%)    | 661/15,152 (4.4%)   | 0.88 (0.74-1.04)                           | 0.125   | 0.91 (0.77-1.08)  | 0.287   | 1.09 (0.92-1.30) | 0.332   | 1.06 (0.89-1.26) | 0.511   |
| Hyperthyroidism                  | 85/3,788 (2.2%)     | 313/15,152 (2.1%)   | 0.92 (0.72-1.17)                           | 0.493   | 0.91 (0.72-1.17)  | 0.473   | 1.08 (0.84-1.39) | 0.563   | N/A              |         |
| Grave’s disease                  | 11/3,788 (0.3%)     | 45/15,152 (0.3%)    | 1.02 (0.53-1.98)                           | 0.947   | 1.01 (0.52-1.97)  | 0.971   | N/A              |         | 0.95 (0.49-1.84) | 0.869   |
| Thyroiditis                      | 65/3,788 (1.7%)     | 247/15,152 (1.6%)   | 0.95 (0.72-1.25)                           | 0.710   | 0.96 (0.72-1.26)  | 0.753   | 1.00 (0.75-1.34) | 0.996   | N/A              |         |
| Autoimmune thyroiditis           | 33/3,788 (0.9%)     | 87/15,152 (0.6%)    | 0.66 (0.44-0.98)                           | 0.041*  | 0.65 (0.43-0.98)  | 0.038*  | N/A              |         | 1.49 (0.98-2.26) | 0.059   |
| Men (n = 16,180)                 |                     |                     |                                            |         |                   |         |                  |         |                  |         |
| Hypothyroidism                   | 44/3,236 (1.4%)     | 142/12,944 (1.1%)   | 0.80 (0.57-1.13)                           | 0.209   | 0.85 (0.60-1.21)  | 0.366   | 1.20 (0.84-1.71) | 0.321   | 1.08 (0.75-1.55) | 0.695   |
| Hyperthyroidism                  | 18/3,236 (0.6%)     | 89/12,944 (0.7%)    | 1.24 (0.75-2.06)                           | 0.410   | 1.25 (0.75-2.08)  | 0.403   | 0.79 (0.47-1.34) | 0.386   | N/A              |         |
| Grave’s disease                  | 2/3,236 (0.1%)      | 18/12,944 (0.1%)    | 2.25 (0.52-9.71)                           | 0.276   | 2.38 (0.55-10.30) | 0.247   | N/A              |         | 0.42 (0.10-1.81) | 0.242   |
| Thyroiditis                      | 14/3,236 (0.4%)     | 57/12,944 (0.4%)    | 1.02 (0.57-1.83)                           | 0.953   | 1.04 (0.58-1.88)  | 0.894   | 0.95 (0.51-1.75) | 0.866   | N/A              |         |
| Autoimmune thyroiditis           | 10/3,236 (0.3%)     | 14/12,944 (0.1%)    | 0.35 (0.16-0.79)                           | 0.011*  | 0.37 (0.16-0.83)  | 0.016*  | N/A              |         | 2.61 (1.11-6.14) | 0.028*  |
| Women (n = 24,170)               |                     |                     |                                            |         |                   |         |                  |         |                  |         |
| Hypothyroidism                   | 240/4,834 (5.0%)    | 838/19,336 (4.3%)   | 0.87 (0.75-                                | 0.056   | 0.91 (0.78-1.05)  | 0.194   | 1.11 (0.95-      | 0.202   | 1.09 (0.94-1.28) | 0.257   |

|                                   |                  |                   |                  |        |                  |       |                  |        |                  |        |
|-----------------------------------|------------------|-------------------|------------------|--------|------------------|-------|------------------|--------|------------------|--------|
|                                   |                  |                   | 1.00)            |        |                  |       | 1.29)            |        |                  |        |
| Hyperthyroidism                   | 116/4,834 (2.4%) | 442/19,336 (2.3%) | 0.95 (0.77-1.17) | 0.637  | 0.96 (0.78-1.19) | 0.727 | 1.02 (0.82-1.27) | 0.831  | N/A              |        |
| Grave's disease                   | 18/4,834 (0.4%)  | 79/19,336 (0.4%)  | 1.10 (0.66-1.83) | 0.722  | 1.09 (0.65-1.83) | 0.739 | N/A              |        | 0.89 (0.53-1.50) | 0.669  |
| Thyroiditis                       | 94/4,834 (1.9%)  | 366/19,336 (1.9%) | 0.97 (0.77-1.22) | 0.814  | 0.98 (0.78-1.24) | 0.879 | 0.98 (0.77-1.25) | 0.858  | N/A              |        |
| Autoimmune thyroiditis            | 42/4,834 (0.9%)  | 141/19,336 (0.7%) | 0.84 (0.59-1.19) | 0.317  | 0.85 (0.60-1.20) | 0.355 | N/A              |        | 1.13 (0.79-1.62) | 0.500  |
| <b>Low income (n = 15,525)</b>    |                  |                   |                  |        |                  |       |                  |        |                  |        |
| Hypothyroidism                    | 122/3,105 (3.9%) | 368/12,420 (3.0%) | 0.74 (0.60-0.92) | 0.006* | 0.79 (0.63-0.97) | 0.028 | 1.29 (1.03-1.60) | 0.024* | 1.26 (1.01-1.57) | 0.038* |
| Hyperthyroidism                   | 54/3,105 (1.7%)  | 215/12,420 (1.7%) | 1.00 (0.74-1.35) | 0.975  | 1.02 (0.75-1.39) | 0.886 | 0.95 (0.69-1.30) | 0.745  | N/A              |        |
| Grave's disease                   | 5/3,105 (0.2%)   | 33/12,420 (0.3%)  | 1.65 (0.64-4.24) | 0.296  | 1.68 (0.65-4.33) | 0.281 | N/A              |        | 0.57 (0.22-1.47) | 0.243  |
| Thyroiditis                       | 40/3,105 (1.3%)  | 160/12,420 (1.3%) | 1.00 (0.71-1.42) | 1.000  | 0.99 (0.70-1.41) | 0.971 | 0.94 (0.65-1.36) | 0.753  | N/A              |        |
| Autoimmune thyroiditis            | 19/3,105 (0.6%)  | 59/12,420 (0.5%)  | 0.78 (0.46-1.30) | 0.335  | 0.77 (0.46-1.30) | 0.334 | N/A              |        | 1.16 (0.68-1.98) | 0.592  |
| <b>Middle income (n = 11,735)</b> |                  |                   |                  |        |                  |       |                  |        |                  |        |
| Hypothyroidism                    | 81/2,347 (3.5%)  | 288/9,388 (3.1%)  | 0.88 (0.69-1.14) | 0.337  | 0.94 (0.72-1.21) | 0.608 | 1.06 (0.82-1.38) | 0.656  | 1.03 (0.79-1.34) | 0.843  |
| Hyperthyroidism                   | 40/2,347 (1.7%)  | 150/9,388 (1.6%)  | 0.94 (0.66-1.33) | 0.714  | 0.93 (0.65-1.33) | 0.688 | 1.06 (0.73-1.54) | 0.753  | N/A              |        |
| Grave's disease                   | 10/2,347 (0.4%)  | 34/9,388 (0.4%)   | 0.85 (0.42-1.72) | 0.651  | 0.85 (0.42-1.74) | 0.663 | N/A              |        | 1.13 (0.55-2.30) | 0.747  |
| Thyroiditis                       | 35/2,347 (1.5%)  | 131/9,388 (1.4%)  | 0.93 (0.64-1.36) | 0.724  | 0.96 (0.66-1.40) | 0.831 | 1.00 (0.67-1.50) | 0.989  | N/A              |        |
| Autoimmune thyroiditis            | 18/2,347 (0.8%)  | 48/9,388 (0.5%)   | 0.67 (0.39-1.15) | 0.141  | 0.69 (0.40-1.20) | 0.185 | N/A              |        | 1.42 (0.80-2.50) | 0.228  |
| <b>High income (n = 13,090)</b>   |                  |                   |                  |        |                  |       |                  |        |                  |        |
| Hypothyroidism                    | 81/2,618 (3.1%)  | 324/10,472 (3.1%) | 1.00 (0.78-1.28) | 1.000  | 1.02 (0.75-1.39) | 0.886 | 0.98 (0.75-1.26) | 0.850  | 0.95 (0.73-1.24) | 0.711  |
| Hyperthyroidism                   | 40/2,618 (1.5%)  | 166/10,472 (1.6%) | 1.04 (0.73-1.47) | 0.832  | 1.05 (0.74-1.49) | 0.805 | 0.96 (0.67-1.38) | 0.830  | N/A              |        |
| Grave's disease                   | 5/2,618 (0.2%)   | 30/10,472 (0.3%)  | 1.50 (0.58-3.88) | 0.400  | 1.50 (0.58-3.87) | 0.407 | N/A              |        | 0.66 (0.25-1.70) | 0.386  |
| Thyroiditis                       | 33/2,618 (1.3%)  | 132/10,472 (1.3%) | 1.00 (0.68-      | 1.000  | 1.02 (0.69-1.51) | 0.912 | 1.00 (0.66-      | 0.989  | N/A              |        |

|                                      |                  |                   |                           |       |                  |        |                  |        |                   |       |
|--------------------------------------|------------------|-------------------|---------------------------|-------|------------------|--------|------------------|--------|-------------------|-------|
| Autoimmune thyroiditis               | 15/2,618 (0.6%)  | 48/10,472 (0.5%)  | 1.47)<br>0.80 (0.45-1.43) | 0.449 | 0.81 (0.45-1.46) | 0.487  | 1.50)<br>N/A     |        | 1.29 (0.70-2.35)  | 0.412 |
| <b>CCI scores = 0 (n = 36,031)</b>   |                  |                   |                           |       |                  |        |                  |        |                   |       |
| Hypothyroidism                       | 204/6,233 (3.3%) | 821/29,207 (2.8%) | 0.89 (0.76-1.04)          | 0.126 | 0.84 (0.72-0.98) | 0.030* | 1.20 (1.02-1.41) | 0.031* | 1.17 (0.99-1.37)  | 0.061 |
| Hyperthyroidism                      | 103/6,233 (1.7%) | 474/29,207 (1.6%) | 1.02 (0.82-1.26)          | 0.881 | 0.98 (0.79-1.22) | 0.870  | 0.99 (0.79-1.24) | 0.936  | N/A               |       |
| Grave's disease                      | 16/6,233 (0.3%)  | 89/29,207 (0.3%)  | 1.23 (0.72-2.09)          | 0.448 | 1.24 (0.73-2.11) | 0.433  | N/A              |        | 0.78 (0.46-1.33)  | 0.363 |
| Thyroiditis                          | 85/6,233 (1.4%)  | 378/29,207 (1.3%) | 0.98 (0.78-1.24)          | 0.879 | 0.96 (0.76-1.22) | 0.744  | 0.98 (0.76-1.26) | 0.886  | N/A               |       |
| Autoimmune thyroiditis               | 40/6,233 (0.6%)  | 138/29,207 (0.5%) | 0.76 (0.53-1.08)          | 0.129 | 0.74 (0.52-1.06) | 0.100  | N/A              |        | 1.25 (0.87-1.80)  | 0.237 |
| <b>CCI scores = 1 (n = 2,278)</b>    |                  |                   |                           |       |                  |        |                  |        |                   |       |
| Hypothyroidism                       | 42/1,110 (3.8%)  | 75/1,673 (4.5%)   | 1.15 (0.78-1.70)          | 0.477 | 1.08 (0.73-1.60) | 0.680  | 0.89 (0.60-1.33) | 0.570  | 0.87 (0.58-1.30)  | 0.492 |
| Hyperthyroidism                      | 17/1,110 (1.5%)  | 24/1,673 (1.4%)   | 0.90 (0.48-1.69)          | 0.744 | 0.89 (0.48-1.68) | 0.722  | 1.06 (0.55-2.05) | 0.856  | N/A               |       |
| Grave's disease                      | 2/1,110 (0.2%)   | 4/1,673 (0.2%)    | 1.28 (0.23-7.01)          | 0.775 | 1.29 (0.24-7.05) | 0.771  | N/A              |        | 0.66 (0.12-3.82)  | 0.647 |
| Thyroiditis                          | 15/1,110 (1.4%)  | 17/1,673 (1.0%)   | 0.72 (0.36-1.45)          | 0.361 | 0.74 (0.36-1.49) | 0.391  | 1.39 (0.66-2.90) | 0.386  | N/A               |       |
| Autoimmune thyroiditis               | 07/1,110 (0.6%)  | 04/1,673 (0.2%)   | 0.36 (0.11-1.25)          | 0.108 | 0.38 (0.11-1.30) | 0.124  | N/A              |        | 2.99 (0.84-10.70) | 0.092 |
| <b>CCI scores ≥ 2 (n = 2,041)</b>    |                  |                   |                           |       |                  |        |                  |        |                   |       |
| Hypothyroidism                       | 38/727 (5.2%)    | 84/1,400 (6.0%)   | 1.07 (0.72-1.58)          | 0.748 | 1.02 (0.69-1.53) | 0.907  | 1.03 (0.68-1.55) | 0.902  | 0.99 (0.66-1.49)  | 0.950 |
| Hyperthyroidism                      | 14/727 (1.9%)    | 33/1,400 (2.4%)   | 1.14 (0.60-2.14)          | 0.690 | 1.04 (0.55-1.97) | 0.909  | 1.09 (0.56-2.12) | 0.812  | N/A               |       |
| Grave's disease                      | 2/727 (0.3%)     | 4/1,400 (0.3%)    | 0.96 (0.18-5.27)          | 0.964 | 0.81 (0.15-4.48) | 0.813  | N/A              |        | 1.30 (0.23-7.39)  | 0.768 |
| Thyroiditis                          | 08/727 (1.1%)    | 28/1,400 (2.0%)   | 1.70 (0.77-3.74)          | 0.190 | 1.62 (0.73-3.58) | 0.235  | 0.60 (0.26-1.38) | 0.225  | N/A               |       |
| Autoimmune thyroiditis               | 05/727 (0.7%)    | 13/1,400 (0.9%)   | 1.25 (0.45-3.53)          | 0.669 | 1.16 (0.41-3.29) | 0.778  | N/A              |        | 0.84 (0.29-2.48)  | 0.757 |
| <b>Non-hypertension (n = 32,241)</b> |                  |                   |                           |       |                  |        |                  |        |                   |       |
| Hypothyroidism                       | 183/6,413 (2.9%) | 691/25,824 (2.7%) | 0.94 (0.79-1.10)          | 0.432 | 0.97 (0.82-1.15) | 0.710  | 1.05 (0.88-1.25) | 0.574  | 1.03 (0.87-1.22)  | 0.746 |

|                                 |                  |                   |                  |        |                  |        |                  |        |                  |        |
|---------------------------------|------------------|-------------------|------------------|--------|------------------|--------|------------------|--------|------------------|--------|
| Hyperthyroidism                 | 96/6,413 (1.5%)  | 398/25,824 (1.5%) | 1.03 (0.82-1.29) | 0.799  | 1.04 (0.83-1.30) | 0.732  | 0.98 (0.77-1.24) | 0.843  | N/A              |        |
| Grave's disease                 | 15/6,413 (0.2%)  | 83/25,824 (0.3%)  | 1.38 (0.79-2.38) | 0.257  | 1.38 (0.80-2.41) | 0.249  | N/A              |        | 0.71 (0.41-1.24) | 0.234  |
| Thyroiditis                     | 76/6,413 (1.2%)  | 335/25,824 (1.3%) | 1.10 (0.85-1.41) | 0.475  | 1.10 (0.85-1.41) | 0.464  | 0.90 (0.69-1.18) | 0.448  | N/A              |        |
| Autoimmune thyroiditis          | 34/6,413 (0.5%)  | 125/25,824 (0.5%) | 0.91 (0.62-1.33) | 0.637  | 0.93 (0.63-1.36) | 0.695  | N/A              |        | 1.08 (0.73-1.60) | 0.694  |
| <b>Hypertension (n = 8,109)</b> |                  |                   |                  |        |                  |        |                  |        |                  |        |
| Hypothyroidism                  | 101/1,657 (6.1%) | 289/6,456 (4.5%)  | 0.72 (0.57-0.91) | 0.006* | 0.75 (0.59-0.95) | 0.017* | 1.29 (1.01-1.66) | 0.040* | 1.25 (0.98-1.60) | 0.078  |
| Hyperthyroidism                 | 38/1,657 (2.3%)  | 133/6,456 (2.1%)  | 0.90 (0.62-1.29) | 0.558  | 0.88 (0.61-1.27) | 0.489  | 1.05 (0.71-1.53) | 0.819  | N/A              |        |
| Grave's disease                 | 5/1,657 (0.3%)   | 14/6,456 (0.2%)   | 0.72 (0.26-2.00) | 0.526  | 0.71 (0.25-1.98) | 0.511  | N/A              |        | 1.30 (0.46-3.64) | 0.623  |
| Thyroiditis                     | 32/1,657 (1.9%)  | 88/6,456 (1.4%)   | 0.70 (0.47-1.06) | 0.089  | 0.70 (0.46-1.06) | 0.093  | 1.28 (0.82-1.98) | 0.276  | N/A              |        |
| Autoimmune thyroiditis          | 18/1,657 (1.1%)  | 30/6,456 (0.5%)   | 0.43 (0.24-0.77) | 0.004* | 0.41 (0.23-0.75) | 0.003* | N/A              |        | 2.12 (1.15-3.92) | 0.017* |

Abbreviations: CCI, Charlson comorbidity index; N/A, Not applicable

\* Conditional logistic regression, Significance at P < 0.05

† Models were stratified by age, sex, and income.

‡ Model 1 was adjusted for CCI scores and hypertension.

§ Model 2 was adjusted for model 1 plus hypothyroidism, hyperthyroidism, and thyroiditis.

|| Model 3 was adjusted for model 1 plus hypothyroidism, Grave's disease, and autoimmune thyroiditis.

**Table S2.** Stratified subgroup analyses of odd ratios of each thyroid disease for morbidity in COVID-19 participants by covariates

| Characteristics                       | Severe                              | Mild participants   | ORs (95% confidence interval) for morbidity |             |                   |             |                  |             |                   |             |
|---------------------------------------|-------------------------------------|---------------------|---------------------------------------------|-------------|-------------------|-------------|------------------|-------------|-------------------|-------------|
|                                       | participants<br>(exposure/total, %) | (exposure/total, %) | Crude                                       | P-<br>value | Model 1†          | P-<br>value | Model 2‡         | P-<br>value | Model 3§          | P-<br>value |
| <b>Age &lt; 50 years old ( n = )</b>  |                                     |                     |                                             |             |                   |             |                  |             |                   |             |
| Hypothyroidism                        | 3/98 (3.1%)                         | 94/4,184 (2.2%)     | 0.73 (0.23-2.34)                            | 0.592       | 0.91 (0.27-3.02)  | 0.876       | 0.96 (0.27-3.49) | 0.954       | 1.02 (0.28-3.67)  | 0.981       |
| Hyperthyroidism                       | 2/98 (2.0%)                         | 47/4,184 (1.1%)     | 0.55 (0.13-2.28)                            | 0.406       | 0.72 (0.17-3.12)  | 0.658       | 1.19 (0.26-5.55) | 0.823       | N/A               |             |
| Grave’s disease                       | 0/98 (0.0%)                         | 9/4,184 (0.2%)      | N/A                                         |             | N/A               |             | N/A              |             | N/A               |             |
| Thyroiditis                           | 2/98 (2.0%)                         | 41/4,184 (1.0%)     | 0.48 (0.11-1.99)                            | 0.308       | 0.50 (0.12-2.12)  | 0.350       | 1.85 (0.37-9.29) | 0.453       | N/A               |             |
| Autoimmune thyroiditis                | 1/98 (1.0%)                         | 18/4,184 (0.4%)     | 0.42 (0.06-3.17)                            | 0.400       | 0.48 (0.06-3.67)  | 0.481       | N/A              |             | 2.01 (0.23-17.74) | 0.532       |
| <b>Age ≥ 50 years old (n = 3,788)</b> |                                     |                     |                                             |             |                   |             |                  |             |                   |             |
| Hypothyroidism                        | 20/471 (4.2%)                       | 167/3,317 (5.0%)    | 1.20 (0.74-1.92)                            | 0.461       | 1.31 (0.80-2.14)  | 0.288       | 1.07 (0.63-1.82) | 0.812       | 1.06 (0.62-1.80)  | 0.838       |
| Hyperthyroidism                       | 8/471 (1.7%)                        | 77/3,317 (2.3%)     | 1.38 (0.66-2.87)                            | 0.396       | 1.17 (0.55-2.46)  | 0.687       | 1.37 (0.62-3.03) | 0.435       | N/A               |             |
| Grave’s disease                       | 1/471 (0.2%)                        | 10/3,317 (0.3%)     | 1.42 (0.18-11.11)                           | 0.738       | 1.09 (0.14-8.69)  | 0.934       | N/A              |             | 1.93 (0.22-16.97) | 0.555       |
| Thyroiditis                           | 3/471 (0.6%)                        | 62/3,317 (1.9%)     | 2.97 (0.93-9.49)                            | 0.067       | 2.97 (0.90-9.87)  | 0.075       | 0.53 (0.15-1.81) | 0.310       | N/A               |             |
| Autoimmune thyroiditis                | 2/471 (0.4%)                        | 31/3,317 (0.9%)     | 2.21 (0.53-9.27)                            | 0.278       | 2.00 (0.47-8.49)  | 0.347       | N/A              |             | 0.69 (0.15-3.27)  | 0.643       |
| <b>Men (n = 3,236)</b>                |                                     |                     |                                             |             |                   |             |                  |             |                   |             |
| Hypothyroidism                        | 8/306 (2.6%)                        | 36/2,930 (1.2%)     | 0.46 (0.21-1.01)                            | 0.052       | 0.80 (0.35-1.85)  | 0.597       | 1.21 (0.50-2.91) | 0.669       | 1.17 (0.48-2.85)  | 0.725       |
| Hyperthyroidism                       | 3/306 (1.0%)                        | 15/2,930 (0.5%)     | 0.52 (0.15-1.81)                            | 0.303       | 0.62 (0.17-2.29)  | 0.473       | 1.62 (0.42-6.33) | 0.487       | N/A               |             |
| Grave’s disease                       | 0/306 (0.0%)                        | 2/2,930 (0.1%)      | N/A                                         |             | N/A               |             | N/A              |             | N/A               |             |
| Thyroiditis                           | 1/306 (0.3%)                        | 13/2,930 (0.4%)     | 1.36 (0.18-10.42)                           | 0.768       | 1.81 (0.23-14.21) | 0.574       | 0.50 (0.06-4.38) | 0.535       | N/A               |             |
| Autoimmune thyroiditis                | 1/306 (0.3%)                        | 9/2,930 (0.3%)      | 0.94 (0.12-7.42)                            | 0.952       | 1.38 (0.17-11.31) | 0.763       | N/A              |             | 0.70 (0.07-6.52)  | 0.751       |
| <b>Women (n = 4,834)</b>              |                                     |                     |                                             |             |                   |             |                  |             |                   |             |
| Hypothyroidism                        | 15/263 (5.7%)                       | 225/4,571 (4.9%)    | 0.86 (0.50-1.47)                            | 0.571       | 1.18 (0.67-2.10)  | 0.570       | 0.93 (0.52-1.66) | 0.802       | 0.92 (0.51-1.63)  | 0.763       |
| Hyperthyroidism                       | 7/263 (2.7%)                        | 109/4,571 (2.4%)    | 0.89 (0.41-1.94)                            | 0.775       | 0.96 (0.43-2.11)  | 0.910       | 1.16 (0.52-2.61) | 0.722       | N/A               |             |
| Grave’s disease                       | 1/263 (0.4%)                        | 17/4,571 (0.4%)     | 0.98 (0.13-7.37)                            | 0.983       | 0.78 (0.10-6.03)  | 0.815       | N/A              |             | 1.20 (0.14-10.11) | 0.869       |
| Thyroiditis                           | 4/263 (1.5%)                        | 90/4,571 (2.0%)     | 1.30 (0.47-3.57)                            | 0.610       | 1.47 (0.50-4.27)  | 0.482       | 0.74 (0.25-2.18) | 0.580       | N/A               |             |
| Autoimmune thyroiditis                | 2/263 (0.8%)                        | 40/4,571 (0.9%)     | 1.15 (0.28-4.79)                            | 0.846       | 1.16 (0.27-4.95)  | 0.839       | N/A              |             | 0.94 (0.21-4.32)  | 0.937       |
| <b>Low income (n = 3,105)</b>         |                                     |                     |                                             |             |                   |             |                  |             |                   |             |
| Hypothyroidism                        | 8/196 (4.1%)                        | 114/2,909 (3.9%)    | 0.96 (0.46-1.99)                            | 0.908       | 1.53 (0.70-3.36)  | 0.288       | 0.71 (0.32-1.61) | 0.416       | 0.72 (0.32-1.63)  | 0.427       |
| Hyperthyroidism                       | 3/196 (1.5%)                        | 51/2,909 (1.8%)     | 1.15 (0.36-3.71)                            | 0.818       | 1.20 (0.36-3.99)  | 0.761       | 0.97 (0.29-3.31) | 0.964       | N/A               |             |
| Grave’s disease                       | 0/196 (0.0%)                        | 5/2,909 (0.2%)      | N/A                                         |             | N/A               |             | N/A              |             | N/A               |             |

|                                   |               |                  |                   |        |                   |        |                   |        |                     |        |
|-----------------------------------|---------------|------------------|-------------------|--------|-------------------|--------|-------------------|--------|---------------------|--------|
| Thyroiditis                       | 2/196 (1.0%)  | 38/2,909 (1.3%)  | 1.28 (0.31-5.36)  | 0.732  | 1.32 (0.31-5.74)  | 0.708  | 1.10 (0.24-5.11)  | 0.904  | N/A                 |        |
| Autoimmune thyroiditis            | 1/196 (0.5%)  | 18/2,909 (0.6%)  | 1.21 (0.16-9.14)  | 0.851  | 1.58 (0.20-12.59) | 0.665  | N/A               |        | 1.07 (0.12-9.46)    | 0.953  |
| <b>Middle income (n = 2,347)</b>  |               |                  |                   |        |                   |        |                   |        |                     |        |
| Hypothyroidism                    | 9/161 (5.6%)  | 72/2,186 (3.3%)  | 0.58 (0.28-1.17)  | 0.128  | 0.77 (0.36-1.63)  | 0.496  | 1.49 (0.67-3.32)  | 0.330  | 1.44 (0.63-3.26)    | 0.388  |
| Hyperthyroidism                   | 3/161 (1.9%)  | 37/2,186 (1.7%)  | 0.91 (0.28-2.97)  | 0.872  | 1.01 (0.30-3.41)  | 0.985  | 0.91 (0.24-3.45)  | 0.887  | N/A                 |        |
| Grave's disease                   | 0/161 (0.0%)  | 10/2,186 (0.5%)  | N/A               |        | N/A               |        | N/A               |        | N/A                 |        |
| Thyroiditis                       | 3/161 (1.9%)  | 32/2,186 (1.5%)  | 0.78 (0.24-2.58)  | 0.687  | 0.76 (0.23-2.54)  | 0.653  | 1.53 (0.40-5.83)  | 0.538  | N/A                 |        |
| Autoimmune thyroiditis            | 2/161 (1.2%)  | 16/2,186 (0.7%)  | 0.59 (0.13-2.57)  | 0.479  | 0.63 (0.14-2.80)  | 0.541  | N/A               |        | 2.04 (0.38-10.94)   | 0.405  |
| <b>High income (n = 2,618)</b>    |               |                  |                   |        |                   |        |                   |        |                     |        |
| Hypothyroidism                    | 6/212 (2.8%)  | 75/2,406 (3.1%)  | 1.11 (0.48-2.57)  | 0.817  | 1.35 (0.54-3.37)  | 0.519  | 1.08 (0.43-2.72)  | 0.866  | 1.00 (0.40-2.48)    | 0.993  |
| Hyperthyroidism                   | 4/212 (1.9%)  | 36/2,406 (1.5%)  | 0.79 (0.28-2.24)  | 0.657  | 0.80 (0.27-2.37)  | 0.680  | 1.71 (0.57-5.15)  | 0.342  | N/A                 |        |
| Grave's disease                   | 1/212 (0.5%)  | 4/2,406 (0.2%)   | 0.35 (0.04-3.15)  | 0.350  | 0.25 (0.03-2.34)  | 0.222  | N/A               |        | 10.72 (0.73-156.72) | 0.083  |
| Thyroiditis                       | 0/212 (0.0%)  | 33/2,406 (1.4%)  | N/A               |        | N/A               |        | N/A               |        | N/A                 |        |
| Autoimmune thyroiditis            | 0/212 (0.0%)  | 15/2,406 (0.6%)  | N/A               |        | N/A               |        | N/A               |        | N/A                 |        |
| <b>CCI scores = 0 (n = 6,518)</b> |               |                  |                   |        |                   |        |                   |        |                     |        |
| Hypothyroidism                    | 16/240 (6.7%) | 188/5,993 (3.1%) | 0.48 (0.28-0.81)  | 0.006* | 0.55 (0.32-0.96)  | 0.034* | 1.80 (1.02-3.17)  | 0.042* | 1.79 (1.02-3.15)    | 0.044* |
| Hyperthyroidism                   | 8/240 (3.3%)  | 95/5,993 (1.6%)  | 0.49 (0.24-1.03)  | 0.059  | 0.57 (0.27-1.20)  | 0.137  | 1.68 (0.77-3.63)  | 0.190  | N/A                 |        |
| Grave's disease                   | 1/240 (0.4%)  | 15/5,993 (0.3%)  | 0.63 (0.08-4.81)  | 0.658  | 0.63 (0.08-5.05)  | 0.662  | N/A               |        | 1.48 (0.18-12.14)   | 0.717  |
| Thyroiditis                       | 4/240 (1.7%)  | 81/5,993 (1.4%)  | 0.85 (0.31-2.35)  | 0.758  | 0.97 (0.34-2.74)  | 0.956  | 0.71 (0.24-2.10)  | 0.534  | N/A                 |        |
| Autoimmune thyroiditis            | 3/240 (1.3%)  | 37/5,993 (0.6%)  | 0.52 (0.16-1.69)  | 0.275  | 0.68 (0.20-2.31)  | 0.531  | N/A               |        | 1.05 (0.29-3.79)    | 0.945  |
| <b>CCI scores = 1 (n = 889)</b>   |               |                  |                   |        |                   |        |                   |        |                     |        |
| Hypothyroidism                    | 3/143 (2.1%)  | 39/967 (4.0%)    | 2.38 (0.72-7.81)  | 0.153  | 1.84 (0.54-6.28)  | 0.331  | 0.64 (0.19-2.22)  | 0.482  | 0.57 (0.17-1.96)    | 0.373  |
| Hyperthyroidism                   | 0/143 (0.0%)  | 17/967 (1.8%)    | N/A               |        | N/A               |        | N/A               |        | N/A                 |        |
| Grave's disease                   | 0/143 (0.0%)  | 2/967 (0.2%)     | N/A               |        | N/A               |        | N/A               |        | N/A                 |        |
| Thyroiditis                       | 0/143 (0.0%)  | 15/967 (1.6%)    | N/A               |        | N/A               |        | N/A               |        | N/A                 |        |
| Autoimmune thyroiditis            | 0/143 (0.0%)  | 7/967 (0.7%)     | N/A               |        | N/A               |        | N/A               |        | N/A                 |        |
| <b>CCI scores ≥ 2 (n = 663)</b>   |               |                  |                   |        |                   |        |                   |        |                     |        |
| Hypothyroidism                    | 4/186 (2.2%)  | 34/541 (6.3%)    | 3.10 (1.08-8.86)  | 0.035  | 2.62 (0.87-7.88)  | 0.088  | 0.37 (0.12-1.16)  | 0.087  | 0.42 (0.14-1.27)    | 0.122  |
| Hyperthyroidism                   | 2/186 (1.1%)  | 12/541 (2.2%)    | 2.11 (0.47-9.54)  | 0.331  | 1.02 (0.19-5.39)  | 0.986  | 1.00 (0.18-5.59)  | 0.998  | N/A                 |        |
| Grave's disease                   | 0/186 (0.0%)  | 2/541 (0.4%)     | N/A               |        | N/A               |        | N/A               |        | N/A                 |        |
| Thyroiditis                       | 1/186 (0.5%)  | 7/541 (1.3%)     | 2.45 (0.30-20.09) | 0.403  | 1.32 (0.15-11.37) | 0.798  | 1.29 (0.14-12.15) | 0.826  | N/A                 |        |
| Autoimmune thyroiditis            | 0/186 (0.0%)  | 5/541 (0.9%)     | N/A               |        | N/A               |        | N/A               |        | N/A                 |        |

|                                     |               |                  |                   |       |                   |       |                  |       |                   |       |
|-------------------------------------|---------------|------------------|-------------------|-------|-------------------|-------|------------------|-------|-------------------|-------|
| thyroiditis                         |               |                  |                   |       |                   |       |                  |       |                   |       |
| <b>Non-hypertension (n = 6,413)</b> |               |                  |                   |       |                   |       |                  |       |                   |       |
| Hypothyroidism                      | 11/294 (3.7%) | 172/6,119 (2.8%) | 0.74 (0.40-1.38)  | 0.350 | 0.77 (0.41-1.46)  | 0.429 | 1.44 (0.75-2.78) | 0.275 | 1.38 (0.72-2.65)  | 0.329 |
| Hyperthyroidism                     | 4/294 (1.4%)  | 92/6,119 (1.5%)  | 1.11 (0.40-3.03)  | 0.844 | 1.23 (0.43-3.47)  | 0.702 | 0.87 (0.31-2.50) | 0.801 | N/A               |       |
| Grave's disease                     | 0/294 (0.0%)  | 15/6,119 (0.2%)  | N/A               |       | N/A               |       | N/A              |       | N/A               |       |
| Thyroiditis                         | 2/294 (0.7%)  | 74/6,119 (1.2%)  | 1.79 (0.44-7.32)  | 0.419 | 1.77 (0.43-7.26)  | 0.431 | 0.61 (0.14-2.62) | 0.505 | N/A               |       |
| Autoimmune thyroiditis              | 1/294 (0.3%)  | 33/6,119 (0.5%)  | 1.58 (0.22-11.58) | 0.651 | 1.74 (0.23-12.89) | 0.589 | N/A              |       | 0.76 (0.10-5.78)  | 0.787 |
| <b>Hypertension (n = 1,657)</b>     |               |                  |                   |       |                   |       |                  |       |                   |       |
| Hypothyroidism                      | 12/275 (4.4%) | 89/1,382 (6.4%)  | 1.51 (0.81-2.80)  | 0.192 | 1.66 (0.87-3.14)  | 0.122 | 0.77 (0.39-1.54) | 0.462 | 0.75 (0.38-1.52)  | 0.428 |
| Hyperthyroidism                     | 6/275 (2.2%)  | 32/1,382 (2.3%)  | 1.06 (0.44-2.56)  | 0.895 | 0.92 (0.38-2.24)  | 0.851 | 1.91 (0.73-4.97) | 0.188 | N/A               |       |
| Grave's disease                     | 1/275 (0.4%)  | 4/1,382 (0.3%)   | 0.80 (0.09-7.14)  | 0.838 | 0.68 (0.07-6.21)  | 0.732 | N/A              |       | 3.06 (0.32-29.53) | 0.333 |
| Thyroiditis                         | 3/275 (1.1%)  | 29/1,382 (2.1%)  | 1.94 (0.59-6.43)  | 0.276 | 1.80 (0.52-6.20)  | 0.353 | 0.87 (0.24-3.17) | 0.835 | N/A               |       |
| Autoimmune thyroiditis              | 2/275 (0.7%)  | 16/1,382 (1.2%)  | 1.60 (0.37-6.97)  | 0.534 | 1.25 (0.28-5.54)  | 0.768 | N/A              |       | 1.26 (0.25-6.33)  | 0.781 |

Abbreviations: CCI, Charlson comorbidity index; N/A, Not applicable

\* Unconditional logistic regression model, Significance at P < 0.05

† Model 1 was adjusted for age, sex, income, CCI scores and hypertension.

‡ Model 2 was adjusted for model 1 plus hypothyroidism, hyperthyroidism, and thyroiditis.

§ Model 3 was adjusted for model 1 plus hypothyroidism, Grave's disease, and autoimmune thyroiditis.

**Table S3.** Stratified subgroup analyses of odd ratios of each thyroid disease for mortality in COVID-19 participants by covariates

| Characteristics                       | Dead participants<br>(exposure/total, %) | Survived participants<br>(exposure/total, %) | ORs (95% confidence interval) for mortality |         |                   |         |                   |         |                     |         |
|---------------------------------------|------------------------------------------|----------------------------------------------|---------------------------------------------|---------|-------------------|---------|-------------------|---------|---------------------|---------|
|                                       |                                          |                                              | Crude                                       | P-value | Model 1†          | P-value | Model 2‡          | P-value | Model 3§            | P-value |
| <b>Age &lt; 50 years old ( n = )</b>  |                                          |                                              |                                             |         |                   |         |                   |         |                     |         |
| Hypothyroidism                        | 0/4 (0.0%)                               | 97/4,278 (2.3%)                              | N/A                                         |         | N/A               |         | N/A               |         | N/A                 |         |
| Hyperthyroidism                       | 0/4 (0.0%)                               | 49/4,278 (1.1%)                              | N/A                                         |         | N/A               |         | N/A               |         | N/A                 |         |
| Grave’s disease                       | 0/4 (0.0%)                               | 9/4,278 (0.2%)                               | N/A                                         |         | N/A               |         | N/A               |         | N/A                 |         |
| Thyroiditis                           | 0/4 (0.0%)                               | 43/4,278 (1.0%)                              | N/A                                         |         | N/A               |         | N/A               |         | N/A                 |         |
| Autoimmune thyroiditis                | 0/4 (0.0%)                               | 19/4,278 (0.4%)                              | N/A                                         |         | N/A               |         | N/A               |         | N/A                 |         |
| <b>Age ≥ 50 years old (n = 3,788)</b> |                                          |                                              |                                             |         |                   |         |                   |         |                     |         |
| Hypothyroidism                        | 6/233 (2.6%)                             | 181/3,555 (5.1%)                             | 2.03 (0.89-4.63)                            | 0.092   | 2.51 (1.07-5.93)  | 0.035   | 0.52 (0.21-1.30)  | 0.161   | 0.51 (0.21-1.29)    | 0.155   |
| Hyperthyroidism                       | 4/233 (1.7%)                             | 81/3,555 (2.3%)                              | 1.33 (0.49-3.67)                            | 0.577   | 1.05 (0.37-2.93)  | 0.930   | 2.38 (0.75-7.54)  | 0.141   | N/A                 |         |
| Grave’s disease                       | 1/233 (0.4%)                             | 10/3,555 (0.3%)                              | 0.65 (0.08-5.11)                            | 0.684   | 0.41 (0.05-3.32)  | 0.404   | N/A               |         | 15.35 (1.57-150.20) | 0.019   |
| Thyroiditis                           | 0/233 (0.0%)                             | 65/3,555 (1.8%)                              | N/A                                         |         | N/A               |         | N/A               |         | N/A                 |         |
| Autoimmune thyroiditis                | 0/233 (0.0%)                             | 33/3,555 (0.9%)                              | N/A                                         |         | N/A               |         | N/A               |         | N/A                 |         |
| <b>Men (n = 3,236)</b>                |                                          |                                              |                                             |         |                   |         |                   |         |                     |         |
| Hypothyroidism                        | 4/134 (3.0%)                             | 40/3,102 (1.3%)                              | 0.43 (0.15-1.20)                            | 0.107   | 0.89 (0.29-2.77)  | 0.841   | 1.13 (0.34-3.78)  | 0.848   | 1.13 (0.34-3.79)    | 0.848   |
| Hyperthyroidism                       | 1/134 (0.7%)                             | 17/3,102 (0.5%)                              | 0.73 (0.10-5.54)                            | 0.763   | 0.96 (0.12-7.86)  | 0.971   | 1.13 (0.08-15.24) | 0.926   | N/A                 |         |
| Grave’s disease                       | 0/134 (0.0%)                             | 2/3,102 (0.1%)                               | N/A                                         |         | N/A               |         | N/A               |         | N/A                 |         |
| Thyroiditis                           | 0/134 (0.0%)                             | 14/3,102 (0.5%)                              | N/A                                         |         | N/A               |         | N/A               |         | N/A                 |         |
| Autoimmune thyroiditis                | 0/134 (0.0%)                             | 10/3,102 (0.3%)                              | N/A                                         |         | N/A               |         | N/A               |         | N/A                 |         |
| <b>Women (n = 4,834)</b>              |                                          |                                              |                                             |         |                   |         |                   |         |                     |         |
| Hypothyroidism                        | 2/103 (1.9%)                             | 238/4,731 (5.0%)                             | 2.67 (0.66-10.89)                           | 0.170   | 5.67 (1.29-24.94) | 0.022   | 0.25 (0.05-1.14)  | 0.073   | 0.26 (0.06-1.15)    | 0.075   |
| Hyperthyroidism                       | 3/103 (2.9%)                             | 113/4,731 (2.4%)                             | 0.82 (0.26-2.61)                            | 0.731   | 0.83 (0.25-2.74)  | 0.756   | 3.31 (0.92-11.96) | 0.068   | N/A                 |         |
| Grave’s disease                       | 1/103 (1.0%)                             | 17/4,731 (0.4%)                              | 0.37 (0.05-2.79)                            | 0.333   | 0.20 (0.03-1.66)  | 0.137   | N/A               |         | 19.93 (1.80-220.47) | 0.015   |
| Thyroiditis                           | 0/103 (0.0%)                             | 94/4,731 (2.0%)                              | N/A                                         |         | N/A               |         | N/A               |         | N/A                 |         |
| Autoimmune thyroiditis                | 0/103 (0.0%)                             | 42/4,731 (0.9%)                              | N/A                                         |         | N/A               |         | N/A               |         | N/A                 |         |
| <b>Low income (n = 3,105)</b>         |                                          |                                              |                                             |         |                   |         |                   |         |                     |         |



|                                   |             |                  |                   |       |                   |       |                   |       |                     |       |
|-----------------------------------|-------------|------------------|-------------------|-------|-------------------|-------|-------------------|-------|---------------------|-------|
| Hypothyroidism                    | 4/93 (4.3%) | 118/3,012 (3.9%) | 0.91 (0.33-2.51)  | 0.851 | 1.76 (0.59-5.32)  | 0.313 | 0.78 (0.24-2.53)  | 0.676 | 0.78 (0.24-2.52)    | 0.673 |
| Hyperthyroidism                   | 1/93 (1.1%) | 53/3,012 (1.8%)  | 1.65 (0.23-12.05) | 0.623 | 1.68 (0.22-12.63) | 0.617 | 1.22 (0.16-9.53)  | 0.853 | N/A                 |       |
| Grave's disease                   | 0/93 (0.0%) | 5/3,012 (0.2%)   | N/A               |       | N/A               |       | N/A               |       | N/A                 |       |
| Thyroiditis                       | 0/93 (0.0%) | 40/3,012 (1.3%)  | N/A               |       | N/A               |       | N/A               |       | N/A                 |       |
| Autoimmune thyroiditis            | 0/93 (0.0%) | 19/3,012 (0.6%)  | N/A               |       | N/A               |       | N/A               |       | N/A                 |       |
| <b>Middle income (n = 2,347)</b>  |             |                  |                   |       |                   |       |                   |       |                     |       |
| Hypothyroidism                    | 1/59 (1.7%) | 80/2,288 (3.5%)  | 2.10 (0.29-15.36) | 0.464 | 3.76 (0.49-28.81) | 0.202 | 0.28 (0.03-2.50)  | 0.257 | 0.30 (0.04-2.56)    | 0.271 |
| Hyperthyroidism                   | 1/59 (1.7%) | 39/2,288 (1.7%)  | 1.01 (0.14-7.45)  | 0.996 | 1.17 (0.15-9.02)  | 0.879 | 1.57 (0.07-34.02) | 0.773 | N/A                 |       |
| Grave's disease                   | 0/59 (0.0%) | 10/2,288 (0.4%)  | N/A               |       | N/A               |       | N/A               |       | N/A                 |       |
| Thyroiditis                       | 0/59 (0.0%) | 35/2,288 (1.5%)  | N/A               |       | N/A               |       | N/A               |       | N/A                 |       |
| Autoimmune thyroiditis            | 0/59 (0.0%) | 18/2,288 (0.8%)  | N/A               |       | N/A               |       | N/A               |       | N/A                 |       |
| <b>High income (n = 2,618)</b>    |             |                  |                   |       |                   |       |                   |       |                     |       |
| Hypothyroidism                    | 1/85 (1.2%) | 80/2,533 (3.2%)  | 2.74 (0.38-19.87) | 0.320 | 5.10 (0.60-43.50) | 0.137 | 0.38 (0.05-3.28)  | 0.382 | 0.37 (0.04-3.13)    | 0.358 |
| Hyperthyroidism                   | 2/85 (2.4%) | 38/2,533 (1.5%)  | 0.63 (0.15-2.66)  | 0.532 | 0.58 (0.13-2.63)  | 0.479 | 5.25 (1.07-25.87) | 0.041 | N/A                 |       |
| Grave's disease                   | 1/85 (1.2%) | 4/2,533 (0.2%)   | 0.13 (0.02-1.20)  | 0.072 | 0.06 (0.01-0.68)  | 0.023 | N/A               |       | N/A                 |       |
| Thyroiditis                       | 0/85 (0.0%) | 33/2,533 (1.3%)  | N/A               |       | N/A               |       | N/A               |       | N/A                 |       |
| Autoimmune thyroiditis            | 0/85 (0.0%) | 15/2,533 (0.6%)  | N/A               |       | N/A               |       | N/A               |       | N/A                 |       |
| <b>CCI scores = 0 (n = 6,518)</b> |             |                  |                   |       |                   |       |                   |       |                     |       |
| Hypothyroidism                    | 4/59 (6.8%) | 200/6,174 (3.2%) | 0.48 (0.17-1.33)  | 0.158 | 0.49 (0.16-1.53)  | 0.220 | 2.14 (0.66-6.94)  | 0.204 | 2.23 (0.70-7.12)    | 0.174 |
| Hyperthyroidism                   | 2/59 (3.4%) | 101/6,174 (1.6%) | 0.49 (0.12-2.04)  | 0.329 | 0.32 (0.07-1.44)  | 0.138 | 3.43 (0.72-16.25) | 0.121 | N/A                 |       |
| Grave's disease                   | 1/59 (1.7%) | 15/6,174 (0.2%)  | 0.15 (0.02-1.13)  | 0.065 | 0.07 (0.01-0.70)  | 0.024 | N/A               |       | 16.36 (1.39-192.44) | 0.026 |
| Thyroiditis                       | 0/59 (0.0%) | 85/6,174 (1.4%)  | N/A               |       | N/A               |       | N/A               |       | N/A                 |       |
| Autoimmune thyroiditis            | 0/59 (0.0%) | 40/6,174 (0.6%)  | N/A               |       | N/A               |       | N/A               |       | N/A                 |       |
| <b>CCI scores = 1 (n = 889)</b>   |             |                  |                   |       |                   |       |                   |       |                     |       |
| Hypothyroidism                    | 0/56 (0.0%) | 42/1,054 (4.0%)  | N/A               |       | N/A               |       | N/A               |       | N/A                 |       |
| Hyperthyroidism                   | 0/56 (0.0%) | 17/1,054 (1.6%)  | N/A               |       | N/A               |       | N/A               |       | N/A                 |       |
| Grave's disease                   | 0/56 (0.0%) | 2/1,054 (0.2%)   | N/A               |       | N/A               |       | N/A               |       | N/A                 |       |
| Thyroiditis                       | 0/56 (0.0%) | 15/1,054 (1.4%)  | N/A               |       | N/A               |       | N/A               |       | N/A                 |       |

|                                     |              |                  |                   |       |                   |       |                   |       |                     |       |
|-------------------------------------|--------------|------------------|-------------------|-------|-------------------|-------|-------------------|-------|---------------------|-------|
| Autoimmune thyroiditis              | 0/56 (0.0%)  | 7/1,054 (0.7%)   | N/A               |       | N/A               |       | N/A               |       | N/A                 |       |
| <b>CCI scores ≥ 2 (n = 663)</b>     |              |                  |                   |       |                   |       |                   |       |                     |       |
| Hypothyroidism                      | 2/122 (1.6%) | 36/605 (6.0%)    | 3.76 (0.89-15.85) | 0.071 | 3.42 (0.77-15.23) | 0.107 | 0.32 (0.07-1.44)  | 0.138 | 0.31 (0.07-1.41)    | 0.131 |
| Hyperthyroidism                     | 2/122 (1.6%) | 12/605 (2.0%)    | 1.20 (0.26-5.43)  | 0.815 | 0.49 (0.09-2.84)  | 0.430 | 2.38 (0.38-14.98) | 0.356 | N/A                 |       |
| Grave's disease                     | 0/122 (0.0%) | 2/605 (0.3%)     | N/A               |       | N/A               |       | N/A               |       | N/A                 |       |
| Thyroiditis                         | 0/122 (0.0%) | 8/605 (1.3%)     | N/A               |       | N/A               |       | N/A               |       | N/A                 |       |
| Autoimmune thyroiditis              | 0/122 (0.0%) | 5/605 (0.8%)     | N/A               |       | N/A               |       | N/A               |       | N/A                 |       |
| <b>Non-hypertension (n = 6,413)</b> |              |                  |                   |       |                   |       |                   |       |                     |       |
| Hypothyroidism                      | 2/77 (2.6%)  | 181/6,336 (2.9%) | 1.10 (0.27-4.53)  | 0.892 | 1.15 (0.27-4.89)  | 0.855 | 1.70 (0.38-7.67)  | 0.489 | 1.48 (0.33-6.55)    | 0.610 |
| Hyperthyroidism                     | 0/77 (0.0%)  | 96/6,336 (1.5%)  | N/A               |       | N/A               |       | N/A               |       | N/A                 |       |
| Grave's disease                     | 0/77 (0.0%)  | 15/6,336 (0.2%)  | N/A               |       | N/A               |       | N/A               |       | N/A                 |       |
| Thyroiditis                         | 0/77 (0.0%)  | 76/6,336 (1.2%)  | N/A               |       | N/A               |       | N/A               |       | N/A                 |       |
| Autoimmune thyroiditis              | 0/77 (0.0%)  | 34/6,336 (0.5%)  | N/A               |       | N/A               |       | N/A               |       | N/A                 |       |
| <b>Hypertension (n = 1,657)</b>     |              |                  |                   |       |                   |       |                   |       |                     |       |
| Hypothyroidism                      | 4/160 (2.5%) | 97/1,497 (6.5%)  | 2.70 (0.98-7.44)  | 0.055 | 3.21 (1.13-9.11)  | 0.029 | 0.40 (0.13-1.21)  | 0.105 | 0.39 (0.13-1.17)    | 0.093 |
| Hyperthyroidism                     | 4/160 (2.5%) | 34/1,497 (2.3%)  | 0.91 (0.32-2.59)  | 0.854 | 0.74 (0.26-2.14)  | 0.577 | 3.52 (1.05-11.77) | 0.041 | N/A                 |       |
| Grave's disease                     | 1/160 (0.6%) | 4/1,497 (0.3%)   | 0.43 (0.05-3.83)  | 0.446 | 0.34 (0.04-3.12)  | 0.339 | N/A               |       | 18.67 (1.51-230.59) | 0.023 |
| Thyroiditis                         | 0/160 (0.0%) | 32/1,497 (2.1%)  | N/A               |       | N/A               |       | N/A               |       | N/A                 |       |
| Autoimmune thyroiditis              | 0/160 (0.0%) | 18/1,497 (1.2%)  | N/A               |       | N/A               |       | N/A               |       | N/A                 |       |

Abbreviations: CCI, Charlson comorbidity index; N/A, Not applicable

\* Unconditional logistic regression model, Significance at P < 0.05

† Model 1 was adjusted for age, sex, income, CCI scores and hypertension.

‡ Model 2 was adjusted for model 1 plus hypothyroidism, hyperthyroidism, and thyroiditis.

§ Model 3 was adjusted for model 1 plus hypothyroidism, Grave's disease, and autoimmune thyroiditis.
